# Supplementary material for: lncRNA C2dat2 facilitates autophagy and apoptosis via the miR-30d-5p/DDIT4/mTOR axis in cerebral ischemia-reperfusion injury
Source: publisher site journal article supplement (doi:10.18632/aging.202824), 2021-04-04
Supplement: Supplementary file [file aging-v13i8-202824-supplementary-material-SD1.pdf]

SUPPLEMENTARY FIGURES

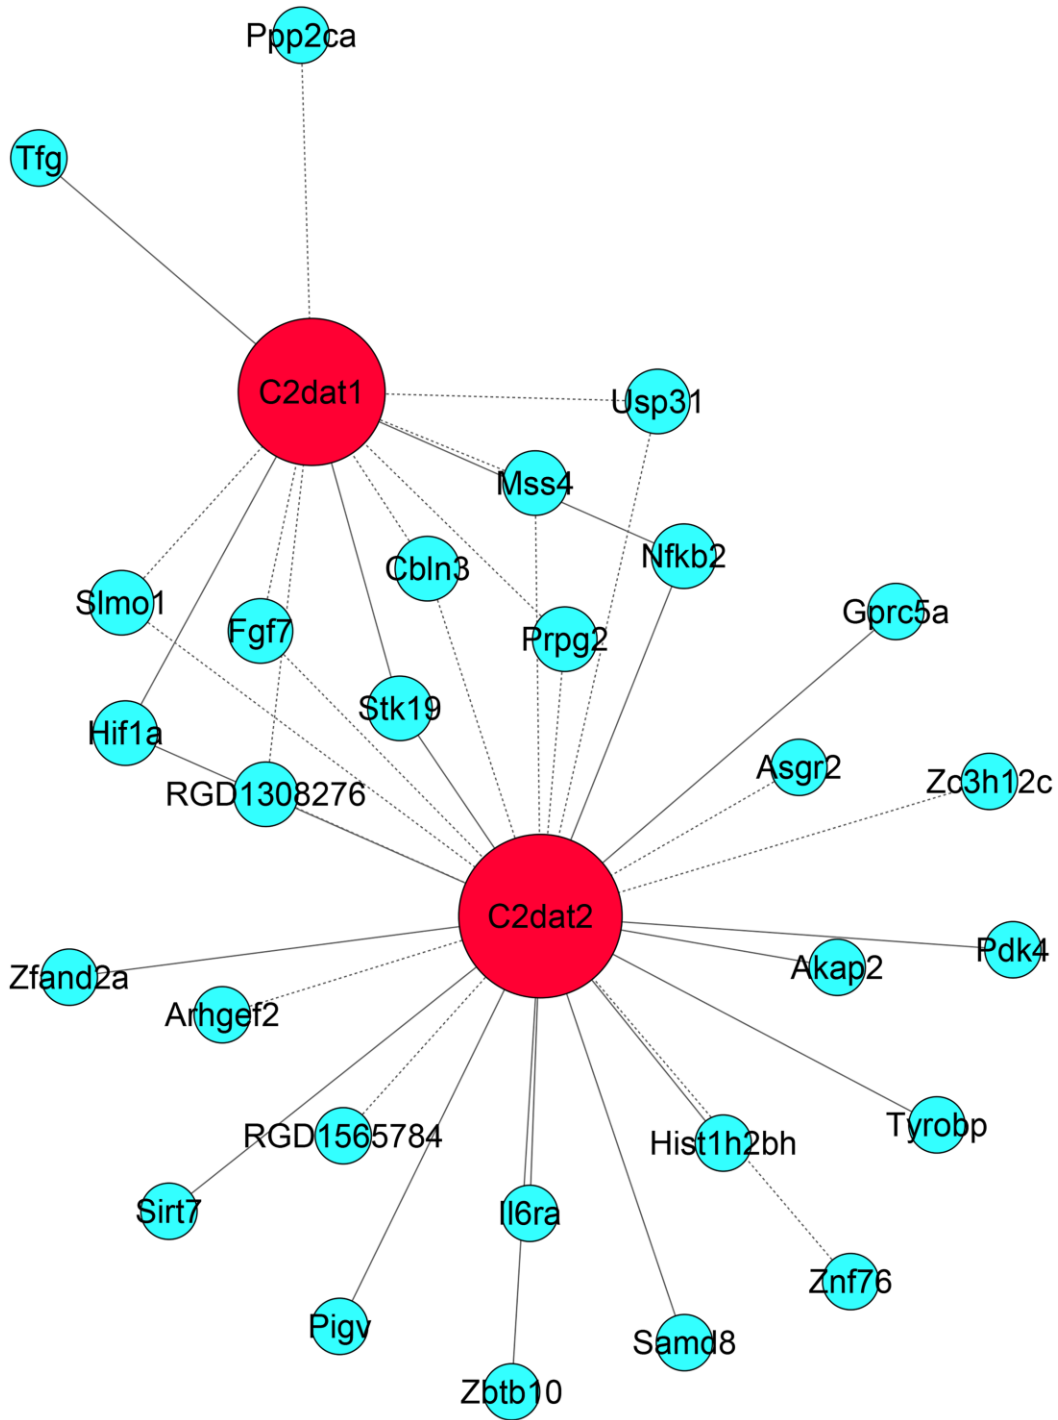

**Supplementary Figure 1. CNC network between C2dat2 and C2dat1.** Light-blue nodes are protein-coding RNAs, and red nodes are lncRNAs. The solid line represents a positive correlation, and the dashed line represents a negative correlation.

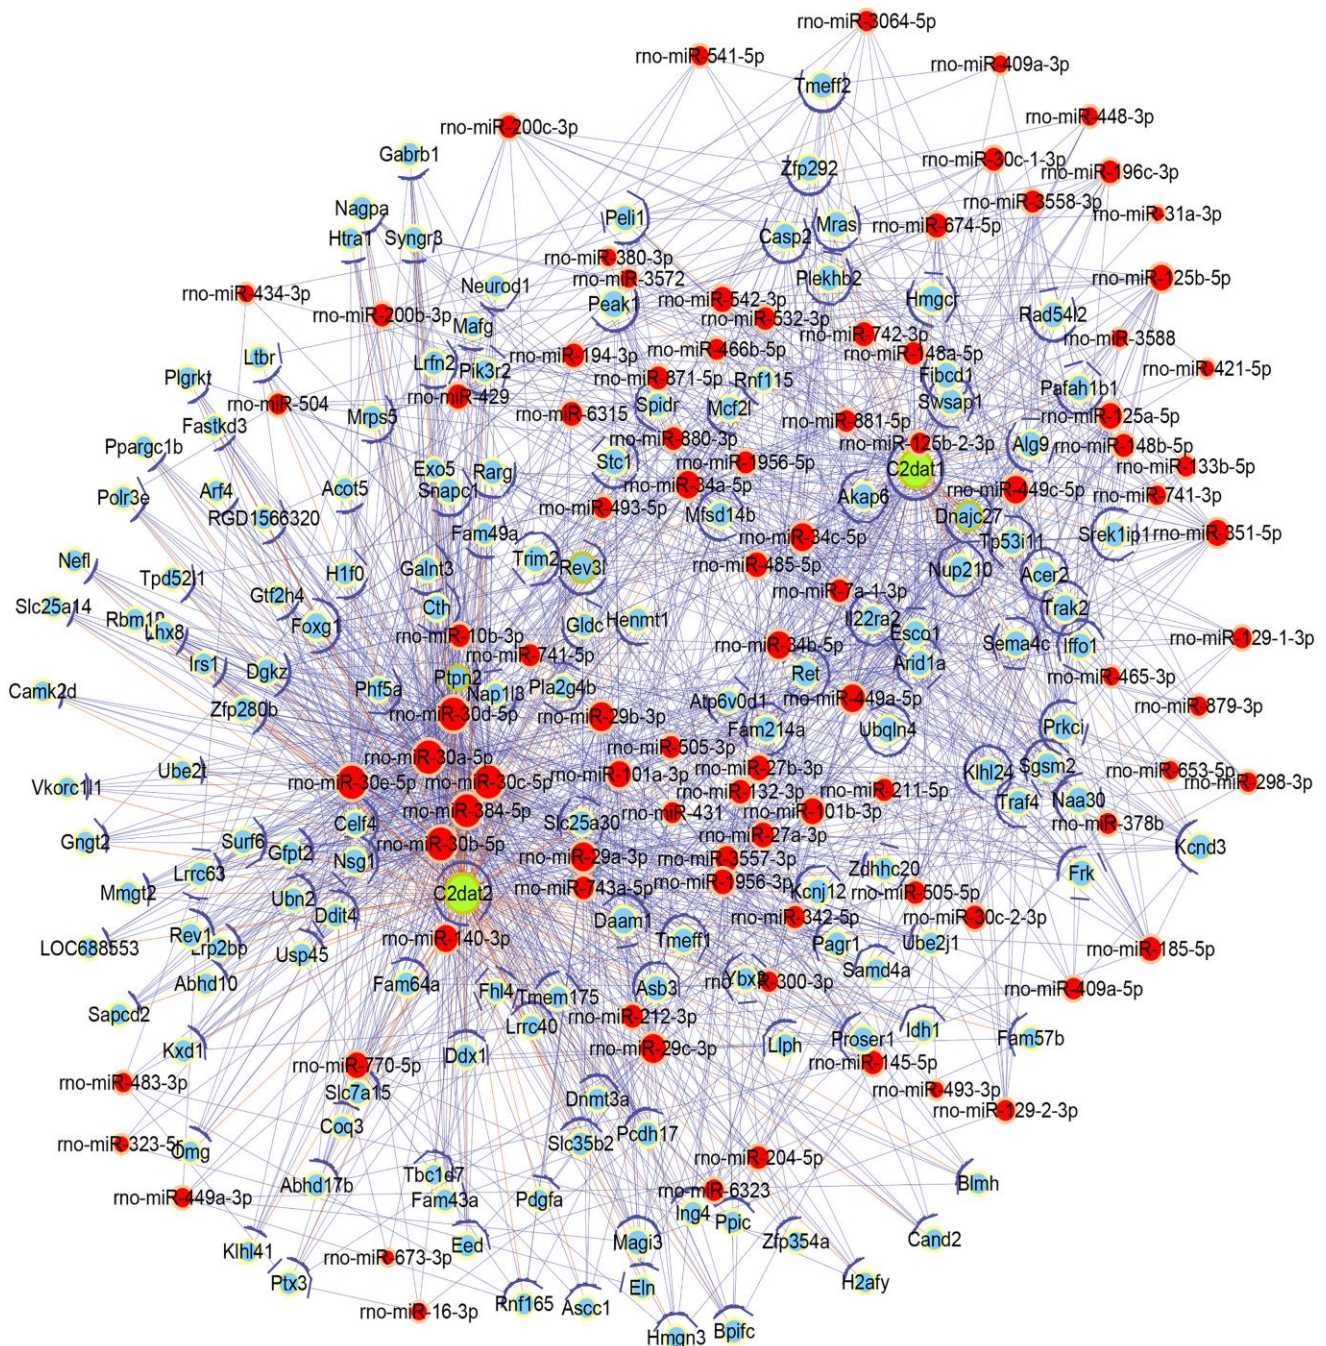

**Supplementary Figure 2. ceRNA network between C2dat2 and C2dat1.** Red nodes are miRNAs, light-blue nodes are protein-coding RNAs, and light-green nodes are noncoding RNAs. Edges with T-shaped arrow represent directed relationships, and edges without arrow represent undirected relationships.

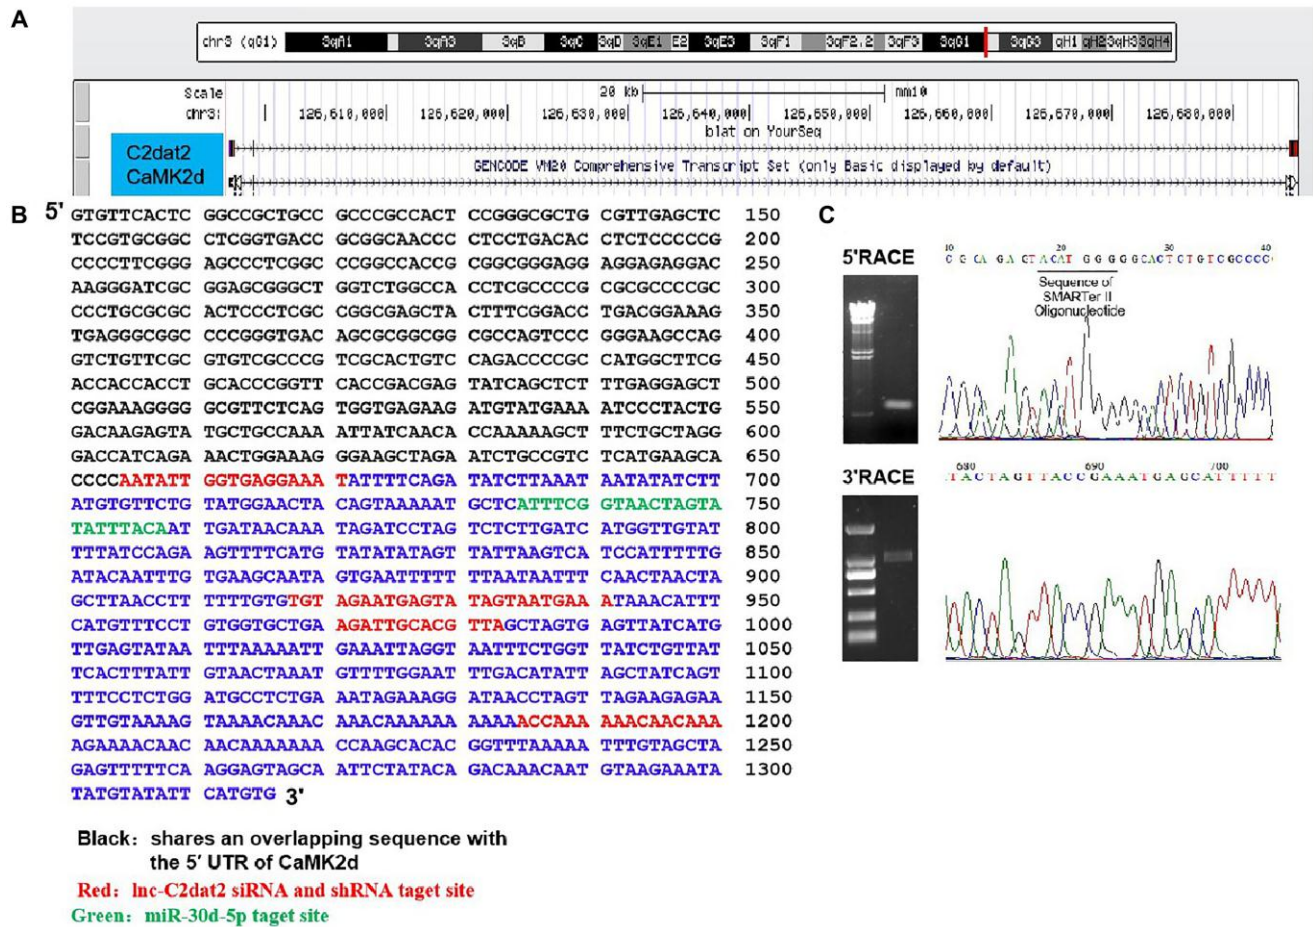

**Supplementary Figure 3. Information about C2dat2.** (A and B) C2dat2 is located on chromosome 3 (A) in the mouse genome and shares an overlapping sequence with the 5'-UTR of CAMK2d. siRNA, short hairpin RNA, and snoRNA were designed to target the region of C2dat2 outside of the overlapping sequence with the 5'-UTR of *CAMK2D*. (B) The full-length sequence of lncRNA C2dat2 was obtained by RACE. The nucleotide sequence of the full-length C2dat2 is given on the right. (C) Agarose gel electrophoresis and sequencing of the PCR product from the 5'-RACE and 3'-RACE procedure revealed putative transcriptional start and end sites of C2dat2.
