# Supplementary material for: lncRNA C2dat2 facilitates autophagy and apoptosis via the miR-30d-5p/DDIT4/mTOR axis in cerebral ischemia-reperfusion injury
Source: Aging (Albany NY). 2021 Apr 4;13(8):11315–35. doi: 10.18632/aging.202824 (PMC8109078; doi:10.18632/aging.202824)
Supplement: Supplementary Table 1 [file aging-13-202824-s002.xls]

## Sheet: aging-21-008942-s002
Supplementary Table 1. lncRNA C2dat2-associated ceRNA network.
SeqName	GeneType	CeNames	CeSymbols	CeTypes	Pvalues	FDR	Rank	CommonMirnasNum	SeqMirnasNum	SeqMirnaCoverage	CeMirnasNum	CeMirnaCoverage	AllMirnasNum	CommonMirnas
C2dat2	noncoding	NM_023020	Tmeff1	protein_coding	3.69e-07	0.000116009	68	9	25	0.36	35	0.257143	765	rno-miR-30e-5p,rno-miR-30a-5p,rno-miR-30d-5p,rno-miR-30b-5p,rno-miR-30c-5p,rno-miR-101a-3p,rno-miR-101b-3p,rno-miR-145-5p,rno-miR-10b-3p
C2dat2	noncoding	NM_212488	Btnl7	protein_coding	9.56e-07	0.00024659	82	6	25	0.24	13	0.461538	765	rno-miR-30e-5p,rno-miR-30a-5p,rno-miR-30d-5p,rno-miR-30b-5p,rno-miR-30c-5p,rno-miR-384-5p
C2dat2	noncoding	NM_001106985	Syngr3	protein_coding	2.54e-05	0.00253938	211	6	25	0.24	21	0.285714	765	rno-miR-30e-5p,rno-miR-30a-5p,rno-miR-30d-5p,rno-miR-30b-5p,rno-miR-30c-5p,rno-miR-384-5p
C2dat2	noncoding	NM_001017443	Lrp2bp	protein_coding	2.69e-07	8.99e-05	61	6	25	0.24	11	0.545455	765	rno-miR-30e-5p,rno-miR-30a-5p,rno-miR-30d-5p,rno-miR-30b-5p,rno-miR-30c-5p,rno-miR-384-5p
C2dat2	noncoding	NM_012578	H1f0	protein_coding	3.22e-05	0.00300691	228	7	25	0.28	32	0.21875	765	rno-miR-30e-5p,rno-miR-30a-5p,rno-miR-30d-5p,rno-miR-30b-5p,rno-miR-30c-5p,rno-miR-3557-3p,rno-miR-384-5p
C2dat2	noncoding	NM_001107764	Pla2g4b	protein_coding	0.000209978	0.00979166	448	5	25	0.2	19	0.263158	765	rno-miR-6315,rno-miR-29b-3p,rno-miR-29c-3p,rno-miR-29a-3p,rno-miR-770-5p
C2dat2	noncoding	NM_031123	Stc1	protein_coding	1.91e-07	6.91e-05	56	10	25	0.4	43	0.232558	765	rno-miR-30e-5p,rno-miR-30a-5p,rno-miR-30d-5p,rno-miR-6315,rno-miR-30b-5p,rno-miR-30c-5p,rno-miR-101a-3p,rno-miR-101b-3p,rno-miR-10b-3p,rno-miR-384-5p
C2dat2	noncoding	NM_001007020	Hmgn3	protein_coding	0.000227972	0.0103379	463	6	25	0.24	30	0.2	765	rno-miR-29b-3p,rno-miR-29c-3p,rno-miR-29a-3p,rno-miR-140-3p,rno-miR-770-5p,rno-miR-3557-3p
C2dat2	noncoding	NM_001106505	Mrps5	protein_coding	0.000227972	0.0103379	464	6	25	0.24	30	0.2	765	rno-miR-30e-5p,rno-miR-30a-5p,rno-miR-30d-5p,rno-miR-30b-5p,rno-miR-30c-5p,rno-miR-145-5p
C2dat2	noncoding	NM_012560	Foxg1	protein_coding	1.54e-05	0.00176405	186	8	25	0.32	40	0.2	765	rno-miR-30e-5p,rno-miR-30a-5p,rno-miR-16-3p,rno-miR-30d-5p,rno-miR-30b-5p,rno-miR-30c-5p,rno-miR-140-3p,rno-miR-384-5p
C2dat2	noncoding	NM_057191	Klhl41	protein_coding	0.000158211	0.00808197	411	5	25	0.2	18	0.277778	765	rno-miR-30e-5p,rno-miR-30a-5p,rno-miR-30d-5p,rno-miR-30b-5p,rno-miR-30c-5p
C2dat2	noncoding	NM_031783	Nefl	protein_coding	4.18e-06	0.000682923	130	6	25	0.24	16	0.375	765	rno-miR-30e-5p,rno-miR-30a-5p,rno-miR-30d-5p,rno-miR-30b-5p,rno-miR-30c-5p,rno-miR-384-5p
C2dat2	noncoding	NM_031143	Dgkz	protein_coding	5.9e-05	0.00436066	273	6	25	0.24	24	0.25	765	rno-miR-30e-5p,rno-miR-30a-5p,rno-miR-30d-5p,rno-miR-30b-5p,rno-miR-30c-5p,rno-miR-384-5p
C2dat2	noncoding	NM_001107583	Gldc	protein_coding	1.9e-06	0.000388188	104	8	25	0.32	31	0.258065	765	rno-miR-30e-5p,rno-miR-30a-5p,rno-miR-30d-5p,rno-miR-30b-5p,rno-miR-30c-5p,rno-miR-140-3p,rno-miR-10b-3p,rno-miR-384-5p
C2dat2	noncoding	NM_001044295	Tpd52l1	protein_coding	3.42e-05	0.0030083	232	6	25	0.24	22	0.272727	765	rno-miR-30e-5p,rno-miR-30a-5p,rno-miR-30d-5p,rno-miR-30b-5p,rno-miR-30c-5p,rno-miR-384-5p
C2dat2	noncoding	NM_001024803	Lrrc63	protein_coding	3.81e-08	3.32e-05	23	8	25	0.32	20	0.4	765	rno-miR-30e-5p,rno-miR-30a-5p,rno-miR-30d-5p,rno-miR-449a-3p,rno-miR-30b-5p,rno-miR-30c-5p,rno-miR-483-3p,rno-miR-384-5p
C2dat2	noncoding	NM_017182	H2afy	protein_coding	2.66e-05	0.00259634	217	5	25	0.2	13	0.384615	765	rno-miR-29b-3p,rno-miR-29c-3p,rno-miR-29a-3p,rno-miR-770-5p,rno-miR-384-5p
C2dat2	noncoding	ENSRNOT00000044312	LOC100910833	protein_coding	5.9e-05	0.00436066	274	6	25	0.24	24	0.25	765	rno-miR-30e-5p,rno-miR-30a-5p,rno-miR-30d-5p,rno-miR-30b-5p,rno-miR-30c-5p,rno-miR-384-5p
C2dat2	noncoding	NM_001106278	Eed	protein_coding	4.22e-09	7.93e-06	11	8	25	0.32	16	0.5	765	rno-miR-30e-5p,rno-miR-30a-5p,rno-miR-30d-5p,rno-miR-204-5p,rno-miR-30b-5p,rno-miR-30c-5p,rno-miR-211-5p,rno-miR-384-5p
C2dat2	noncoding	NM_001134553	Ubn2	protein_coding	3.22e-06	0.000568926	121	8	25	0.32	33	0.242424	765	rno-miR-30e-5p,rno-miR-30a-5p,rno-miR-30d-5p,rno-miR-30b-5p,rno-miR-30c-5p,rno-miR-101a-3p,rno-miR-101b-3p,rno-miR-384-5p
C2dat2	noncoding	NM_001107017	Traf4	protein_coding	5.93e-05	0.00436066	286	5	25	0.2	15	0.333333	765	rno-miR-29b-3p,rno-miR-29c-3p,rno-miR-29a-3p,rno-miR-145-5p,rno-miR-10b-3p
C2dat2	noncoding	NM_012519	Camk2d	protein_coding	0.000158211	0.00808197	412	5	25	0.2	18	0.277778	765	rno-miR-30e-5p,rno-miR-30a-5p,rno-miR-30b-5p,rno-miR-30c-5p,rno-miR-384-5p
C2dat2	noncoding	ENSRNOT00000064965	Gigyf2	protein_coding	7.29e-07	0.000202697	77	10	25	0.4	49	0.204082	765	rno-miR-30e-5p,rno-miR-30a-5p,rno-miR-30d-5p,rno-miR-449a-3p,rno-miR-30b-5p,rno-miR-30c-5p,rno-miR-29b-3p,rno-miR-29c-3p,rno-miR-29a-3p,rno-miR-384-5p
C2dat2	noncoding	NM_001108864	Asb3	protein_coding	2.18e-10	2.33e-06	2	11	25	0.44	31	0.354839	765	rno-miR-30e-5p,rno-miR-30a-5p,rno-miR-30d-5p,rno-miR-30b-5p,rno-miR-30c-5p,rno-miR-29b-3p,rno-miR-29c-3p,rno-miR-29a-3p,rno-miR-140-3p,rno-miR-770-5p,rno-miR-384-5p
C2dat2	noncoding	NM_001106838	Fam214a	protein_coding	6.24e-07	0.000178141	75	9	25	0.36	37	0.243243	765	rno-miR-30e-5p,rno-miR-30a-5p,rno-miR-30d-5p,rno-miR-342-5p,rno-miR-30b-5p,rno-miR-30c-5p,rno-miR-101a-3p,rno-miR-101b-3p,rno-miR-384-5p
C2dat2	noncoding	NM_024151	Arf4	protein_coding	0.000227972	0.0103379	465	6	25	0.24	30	0.2	765	rno-miR-30e-5p,rno-miR-30a-5p,rno-miR-30d-5p,rno-miR-30b-5p,rno-miR-30c-5p,rno-miR-384-5p
C2dat2	noncoding	NM_001013901	Pagr1	protein_coding	3.42e-05	0.0030083	234	6	25	0.24	22	0.272727	765	rno-miR-30e-5p,rno-miR-30a-5p,rno-miR-30d-5p,rno-miR-30b-5p,rno-miR-30c-5p,rno-miR-384-5p
C2dat2	noncoding	NM_019183	Actc1	protein_coding	5.56e-06	0.000816093	144	5	25	0.2	10	0.5	765	rno-miR-30e-5p,rno-miR-30a-5p,rno-miR-30b-5p,rno-miR-30c-5p,rno-miR-384-5p
C2dat2	noncoding	NM_001135915	LOC688553	protein_coding	1.45e-07	6.14e-05	48	5	25	0.2	6	0.833333	765	rno-miR-30e-5p,rno-miR-30a-5p,rno-miR-30d-5p,rno-miR-30b-5p,rno-miR-30c-5p
C2dat2	noncoding	NM_001106642	Ube2j1	protein_coding	5.9e-05	0.00436066	276	6	25	0.24	24	0.25	765	rno-miR-30e-5p,rno-miR-30a-5p,rno-miR-30d-5p,rno-miR-30b-5p,rno-miR-30c-5p,rno-miR-384-5p
C2dat2	noncoding	NM_176075	Ppargc1b	protein_coding	1.74e-08	2.19e-05	17	6	25	0.24	8	0.75	765	rno-miR-30e-5p,rno-miR-30a-5p,rno-miR-30d-5p,rno-miR-30b-5p,rno-miR-30c-5p,rno-miR-384-5p
C2dat2	noncoding	NM_001113781	Fam64a	protein_coding	9.65e-05	0.00602352	336	6	25	0.24	26	0.230769	765	rno-miR-30e-5p,rno-miR-30a-5p,rno-miR-30d-5p,rno-miR-30b-5p,rno-miR-30c-5p,rno-miR-384-5p
C2dat2	noncoding	NM_031721	Htra1	protein_coding	1.33e-05	0.00155123	178	6	25	0.24	19	0.315789	765	rno-miR-30e-5p,rno-miR-30a-5p,rno-miR-30d-5p,rno-miR-30b-5p,rno-miR-30c-5p,rno-miR-384-5p
C2dat2	noncoding	NM_001100789	Ptpn13	protein_coding	2.02e-06	0.000399331	106	7	25	0.28	22	0.318182	765	rno-miR-30e-5p,rno-miR-30a-5p,rno-miR-16-3p,rno-miR-30d-5p,rno-miR-30b-5p,rno-miR-30c-5p,rno-miR-384-5p
C2dat2	noncoding	NM_001173507	Stag2	protein_coding	1.49e-07	6.14e-05	51	10	25	0.4	42	0.238095	765	rno-miR-30a-5p,rno-miR-30b-5p,rno-miR-30c-5p,rno-miR-29b-3p,rno-miR-29c-3p,rno-miR-29a-3p,rno-miR-101a-3p,rno-miR-101b-3p,rno-miR-140-3p,rno-miR-384-5p
C2dat2	noncoding	NM_001034926	Lrrc40	protein_coding	0.00055571	0.0198425	589	5	25	0.2	23	0.217391	765	rno-miR-30e-5p,rno-miR-30a-5p,rno-miR-30d-5p,rno-miR-6315,rno-miR-384-5p
C2dat2	noncoding	NM_001012469	Il21r	protein_coding	2.66e-05	0.00259634	218	5	25	0.2	13	0.384615	765	rno-miR-30e-5p,rno-miR-30a-5p,rno-miR-30d-5p,rno-miR-30b-5p,rno-miR-30c-5p
C2dat2	noncoding	NM_001108560	Rnf115	protein_coding	1.25e-07	5.69e-05	46	6	25	0.24	10	0.6	765	rno-miR-30e-5p,rno-miR-30a-5p,rno-miR-30d-5p,rno-miR-30b-5p,rno-miR-30c-5p,rno-miR-384-5p
C2dat2	noncoding	NM_001108411	Tbc1d7	protein_coding	8.43e-05	0.00560585	315	5	25	0.2	16	0.3125	765	rno-miR-29b-3p,rno-miR-29c-3p,rno-miR-29a-3p,rno-miR-140-3p,rno-miR-770-5p
C2dat2	noncoding	NM_053981	Kcnj12	protein_coding	4.52e-05	0.0037358	254	6	25	0.24	23	0.26087	765	rno-miR-30e-5p,rno-miR-30a-5p,rno-miR-30d-5p,rno-miR-30b-5p,rno-miR-30c-5p,rno-miR-384-5p
C2dat2	noncoding	NM_017074	Cth	protein_coding	4.52e-05	0.0037358	255	6	25	0.24	23	0.26087	765	rno-miR-30e-5p,rno-miR-30a-5p,rno-miR-30d-5p,rno-miR-30c-5p,rno-miR-145-5p,rno-miR-384-5p
C2dat2	noncoding	NM_053951	Mcf2l	protein_coding	2.49e-06	0.000471134	111	8	25	0.32	32	0.25	765	rno-miR-30e-5p,rno-miR-30a-5p,rno-miR-30d-5p,rno-miR-30c-5p,rno-miR-29b-3p,rno-miR-29c-3p,rno-miR-29a-3p,rno-miR-140-3p
C2dat2	noncoding	NM_001107676	Proser1	protein_coding	2.12e-08	2.27e-05	19	10	25	0.4	35	0.285714	765	rno-miR-30e-5p,rno-miR-30a-5p,rno-miR-30d-5p,rno-miR-30b-5p,rno-miR-30c-5p,rno-miR-29b-3p,rno-miR-29c-3p,rno-miR-29a-3p,rno-miR-3557-3p,rno-miR-384-5p
C2dat2	noncoding	NM_024128	Nsg1	protein_coding	1.91e-07	6.91e-05	58	10	25	0.4	43	0.232558	765	rno-miR-30e-5p,rno-miR-30a-5p,rno-miR-30d-5p,rno-miR-323-5p,rno-miR-204-5p,rno-miR-30b-5p,rno-miR-30c-5p,rno-miR-211-5p,rno-miR-3557-3p,rno-miR-384-5p
C2dat2	noncoding	NM_001106773	Bpifc	protein_coding	4.1e-07	0.000125329	69	7	25	0.28	18	0.388889	765	rno-miR-30e-5p,rno-miR-30a-5p,rno-miR-30d-5p,rno-miR-30b-5p,rno-miR-30c-5p,rno-miR-145-5p,rno-miR-3557-3p
C2dat2	noncoding	NM_001204053	Ankhd1	protein_coding	0.000209978	0.00979166	451	5	25	0.2	19	0.263158	765	rno-miR-30b-5p,rno-miR-30c-5p,rno-miR-101a-3p,rno-miR-101b-3p,rno-miR-384-5p
C2dat2	noncoding	NM_001107206	Aff1	protein_coding	0.000151157	0.00798853	399	6	25	0.24	28	0.214286	765	rno-miR-342-5p,rno-miR-204-5p,rno-miR-101a-3p,rno-miR-101b-3p,rno-miR-211-5p,rno-miR-483-3p
C2dat2	noncoding	NM_001201354	Hmgn3	protein_coding	5.93e-05	0.00436066	287	5	25	0.2	15	0.333333	765	rno-miR-29b-3p,rno-miR-29c-3p,rno-miR-29a-3p,rno-miR-770-5p,rno-miR-3557-3p
C2dat2	noncoding	NM_012801	Pdgfa	protein_coding	2.66e-05	0.00259634	219	5	25	0.2	13	0.384615	765	rno-miR-29b-3p,rno-miR-29c-3p,rno-miR-29a-3p,rno-miR-101a-3p,rno-miR-101b-3p
C2dat2	noncoding	NM_001135249	Rarg	protein_coding	0.000227972	0.0103379	468	6	25	0.24	30	0.2	765	rno-miR-30e-5p,rno-miR-30a-5p,rno-miR-30d-5p,rno-miR-30b-5p,rno-miR-30c-5p,rno-miR-384-5p
C2dat2	noncoding	NM_053754	Abcg5	protein_coding	0.000209978	0.00979166	453	5	25	0.2	19	0.263158	765	rno-miR-30d-5p,rno-miR-30b-5p,rno-miR-30c-5p,rno-miR-770-5p,rno-miR-384-5p
C2dat2	noncoding	NM_017333	Ednrb	protein_coding	6.35e-07	0.000178939	76	7	25	0.28	19	0.368421	765	rno-miR-30e-5p,rno-miR-30a-5p,rno-miR-30d-5p,rno-miR-30b-5p,rno-miR-30c-5p,rno-miR-10b-3p,rno-miR-384-5p
C2dat2	noncoding	NM_001037215	Slc35b2	protein_coding	8.47e-09	1.23e-05	14	9	25	0.36	24	0.375	765	rno-miR-30e-5p,rno-miR-30a-5p,rno-miR-30d-5p,rno-miR-30b-5p,rno-miR-30c-5p,rno-miR-29b-3p,rno-miR-29c-3p,rno-miR-29a-3p,rno-miR-384-5p
C2dat2	noncoding	NM_001082574	Fastkd3	protein_coding	4.04e-05	0.00344921	249	5	25	0.2	14	0.357143	765	rno-miR-30e-5p,rno-miR-30a-5p,rno-miR-30d-5p,rno-miR-30c-5p,rno-miR-384-5p
C2dat2	noncoding	ENSRNOT00000002740	Ythdc1	protein_coding	5.34e-06	0.000804264	137	7	25	0.28	25	0.28	765	rno-miR-30e-5p,rno-miR-30a-5p,rno-miR-30d-5p,rno-miR-30b-5p,rno-miR-30c-5p,rno-miR-145-5p,rno-miR-384-5p
C2dat2	noncoding	NM_001108033	Snapc1	protein_coding	1.3e-08	1.74e-05	16	9	25	0.36	25	0.36	765	rno-miR-30e-5p,rno-miR-30a-5p,rno-miR-30d-5p,rno-miR-30b-5p,rno-miR-30c-5p,rno-miR-101a-3p,rno-miR-101b-3p,rno-miR-140-3p,rno-miR-384-5p
C2dat2	noncoding	NM_001107973	Exo5	protein_coding	0.000158211	0.00808197	413	5	25	0.2	18	0.277778	765	rno-miR-30a-5p,rno-miR-30d-5p,rno-miR-30b-5p,rno-miR-30c-5p,rno-miR-384-5p
C2dat2	noncoding	NM_031510	Idh1	protein_coding	0.000158211	0.00808197	414	5	25	0.2	18	0.277778	765	rno-miR-30e-5p,rno-miR-30a-5p,rno-miR-30d-5p,rno-miR-30c-5p,rno-miR-384-5p
C2dat2	noncoding	NM_001135250	Rarg	protein_coding	0.000227972	0.0103379	469	6	25	0.24	30	0.2	765	rno-miR-30e-5p,rno-miR-30a-5p,rno-miR-30d-5p,rno-miR-30b-5p,rno-miR-30c-5p,rno-miR-384-5p
C2dat2	noncoding	NM_001106714	Slc7a15	protein_coding	4e-05	0.00344921	246	7	25	0.28	33	0.212121	765	rno-miR-29b-3p,rno-miR-29c-3p,rno-miR-29a-3p,rno-miR-140-3p,rno-miR-10b-3p,rno-miR-770-5p,rno-miR-3557-3p
C2dat2	noncoding	NM_001025013	Mageb16	protein_coding	0.000151157	0.00798853	400	6	25	0.24	28	0.214286	765	rno-miR-30e-5p,rno-miR-30a-5p,rno-miR-30d-5p,rno-miR-30b-5p,rno-miR-30c-5p,rno-miR-384-5p
C2dat2	noncoding	NM_001177442	Glcci1	protein_coding	3.88e-08	3.32e-05	24	10	25	0.4	37	0.27027	765	rno-miR-30e-5p,rno-miR-30a-5p,rno-miR-30d-5p,rno-miR-30b-5p,rno-miR-30c-5p,rno-miR-101a-3p,rno-miR-101b-3p,rno-miR-140-3p,rno-miR-3557-3p,rno-miR-384-5p
C2dat2	noncoding	NM_012956	Gabrb1	protein_coding	1.41e-06	0.000306931	95	7	25	0.28	21	0.333333	765	rno-miR-30e-5p,rno-miR-30a-5p,rno-miR-30d-5p,rno-miR-30b-5p,rno-miR-30c-5p,rno-miR-140-3p,rno-miR-384-5p
C2dat2	noncoding	NM_001003402	Eml5	protein_coding	8.43e-05	0.00560585	317	5	25	0.2	16	0.3125	765	rno-miR-6315,rno-miR-29b-3p,rno-miR-29c-3p,rno-miR-29a-3p,rno-miR-770-5p
C2dat2	noncoding	NM_133402	Nap1l3	protein_coding	0.000839066	0.0257667	690	5	25	0.2	25	0.2	765	rno-miR-29b-3p,rno-miR-29c-3p,rno-miR-29a-3p,rno-miR-101a-3p,rno-miR-101b-3p
C2dat2	noncoding	NM_001025143	Kxd1	protein_coding	9.65e-05	0.00602352	338	6	25	0.24	26	0.230769	765	rno-miR-30e-5p,rno-miR-30a-5p,rno-miR-30d-5p,rno-miR-30b-5p,rno-miR-30c-5p,rno-miR-384-5p
C2dat2	noncoding	NM_001079709	Acot5	protein_coding	5.11e-08	3.62e-05	28	6	25	0.24	9	0.666667	765	rno-miR-30e-5p,rno-miR-30a-5p,rno-miR-30d-5p,rno-miR-30b-5p,rno-miR-30c-5p,rno-miR-384-5p
C2dat2	noncoding	NM_001191650	Tmem101	protein_coding	2.49e-06	0.000471134	112	8	25	0.32	32	0.25	765	rno-miR-30e-5p,rno-miR-30a-5p,rno-miR-30d-5p,rno-miR-30c-5p,rno-miR-29b-3p,rno-miR-29c-3p,rno-miR-29a-3p,rno-miR-384-5p
C2dat2	noncoding	NM_019286	Adh1	protein_coding	0.000686433	0.0228143	638	5	25	0.2	24	0.208333	765	rno-miR-30e-5p,rno-miR-30a-5p,rno-miR-30d-5p,rno-miR-30b-5p,rno-miR-30c-5p
C2dat2	noncoding	NM_001109418	Sapcd2	protein_coding	1.25e-07	5.69e-05	47	6	25	0.24	10	0.6	765	rno-miR-30e-5p,rno-miR-30a-5p,rno-miR-30d-5p,rno-miR-30b-5p,rno-miR-30c-5p,rno-miR-384-5p
C2dat2	noncoding	NM_212501	Gtf2h4	protein_coding	1.45e-07	6.14e-05	49	5	25	0.2	6	0.833333	765	rno-miR-30e-5p,rno-miR-30a-5p,rno-miR-30b-5p,rno-miR-30c-5p,rno-miR-384-5p
C2dat2	noncoding	NM_019266	Scn8a	protein_coding	0.00011684	0.00677711	363	5	25	0.2	17	0.294118	765	rno-miR-30e-5p,rno-miR-30a-5p,rno-miR-30b-5p,rno-miR-30c-5p,rno-miR-384-5p
C2dat2	noncoding	NM_001123352	Abhd10	protein_coding	8.43e-05	0.00560585	319	5	25	0.2	16	0.3125	765	rno-miR-30e-5p,rno-miR-30a-5p,rno-miR-30d-5p,rno-miR-30b-5p,rno-miR-30c-5p
C2dat2	noncoding	ENSRNOT00000027232	Klhl30	protein_coding	4.12e-06	0.000682923	128	8	25	0.32	34	0.235294	765	rno-miR-30e-5p,rno-miR-30a-5p,rno-miR-30d-5p,rno-miR-30b-5p,rno-miR-30c-5p,rno-miR-140-3p,rno-miR-483-3p,rno-miR-384-5p
C2dat2	noncoding	ENSRNOT00000010674	Yars	protein_coding	4.52e-05	0.0037358	257	6	25	0.24	23	0.26087	765	rno-miR-204-5p,rno-miR-29b-3p,rno-miR-29c-3p,rno-miR-29a-3p,rno-miR-211-5p,rno-miR-770-5p
C2dat2	noncoding	NM_001106718	Fam49a	protein_coding	2.69e-07	8.99e-05	62	6	25	0.24	11	0.545455	765	rno-miR-30e-5p,rno-miR-30a-5p,rno-miR-30d-5p,rno-miR-30b-5p,rno-miR-30c-5p,rno-miR-384-5p
C2dat2	noncoding	NM_001003957	Dnmt3a	protein_coding	4.93e-05	0.00394889	266	7	25	0.28	34	0.205882	765	rno-miR-29b-3p,rno-miR-29c-3p,rno-miR-29a-3p,rno-miR-101a-3p,rno-miR-101b-3p,rno-miR-10b-3p,rno-miR-384-5p
C2dat2	noncoding	ENSRNOT00000009120	LOC100910833	protein_coding	5.9e-05	0.00436066	278	6	25	0.24	24	0.25	765	rno-miR-30e-5p,rno-miR-30a-5p,rno-miR-30d-5p,rno-miR-30b-5p,rno-miR-30c-5p,rno-miR-384-5p
C2dat2	noncoding	NM_001106296	Fam57b	protein_coding	5.9e-05	0.00436066	279	6	25	0.24	24	0.25	765	rno-miR-204-5p,rno-miR-29b-3p,rno-miR-29c-3p,rno-miR-29a-3p,rno-miR-211-5p,rno-miR-3557-3p
C2dat2	noncoding	NM_053501	Slc25a14	protein_coding	6.32e-06	0.000889888	149	6	25	0.24	17	0.352941	765	rno-miR-30e-5p,rno-miR-30a-5p,rno-miR-30d-5p,rno-miR-30b-5p,rno-miR-30c-5p,rno-miR-384-5p
C2dat2	noncoding	NM_001039699	Lrfn2	protein_coding	3.42e-05	0.0030083	236	6	25	0.24	22	0.272727	765	rno-miR-30e-5p,rno-miR-30a-5p,rno-miR-30d-5p,rno-miR-30b-5p,rno-miR-30c-5p,rno-miR-384-5p
C2dat2	noncoding	NM_001014028	Abhd17b	protein_coding	6.6e-10	2.35e-06	5	9	25	0.36	19	0.473684	765	rno-miR-30e-5p,rno-miR-30a-5p,rno-miR-30d-5p,rno-miR-30b-5p,rno-miR-30c-5p,rno-miR-101a-3p,rno-miR-101b-3p,rno-miR-145-5p,rno-miR-384-5p
C2dat2	noncoding	NM_001013248	Foxb1	protein_coding	0.000151157	0.00798853	401	6	25	0.24	28	0.214286	765	rno-miR-30e-5p,rno-miR-30a-5p,rno-miR-30d-5p,rno-miR-30b-5p,rno-miR-30c-5p,rno-miR-384-5p
C2dat2	noncoding	NM_001108265	Nagpa	protein_coding	0.000121408	0.00687463	374	6	25	0.24	27	0.222222	765	rno-miR-30e-5p,rno-miR-30a-5p,rno-miR-30d-5p,rno-miR-342-5p,rno-miR-30b-5p,rno-miR-30c-5p
C2dat2	noncoding	NM_001126299	Esco1	protein_coding	1.08e-06	0.000262498	87	8	25	0.32	29	0.275862	765	rno-miR-30e-5p,rno-miR-30a-5p,rno-miR-30d-5p,rno-miR-30b-5p,rno-miR-30c-5p,rno-miR-101a-3p,rno-miR-101b-3p,rno-miR-384-5p
C2dat2	noncoding	NM_203338	Vkorc1l1	protein_coding	0.000209978	0.00979166	455	5	25	0.2	19	0.263158	765	rno-miR-30e-5p,rno-miR-30a-5p,rno-miR-30d-5p,rno-miR-3557-3p,rno-miR-384-5p
C2dat2	noncoding	NM_001109536	Ptx3	protein_coding	3.92e-06	0.000666649	125	7	25	0.28	24	0.291667	765	rno-miR-16-3p,rno-miR-29b-3p,rno-miR-29c-3p,rno-miR-29a-3p,rno-miR-140-3p,rno-miR-483-3p,rno-miR-770-5p
C2dat2	noncoding	NM_012722	Eln	protein_coding	0.000121408	0.00687463	375	6	25	0.24	27	0.222222	765	rno-miR-323-5p,rno-miR-29b-3p,rno-miR-29c-3p,rno-miR-29a-3p,rno-miR-101a-3p,rno-miR-101b-3p
C2dat2	noncoding	NM_001081751	Pou5f2	protein_coding	2.69e-07	8.99e-05	63	6	25	0.24	11	0.545455	765	rno-miR-30e-5p,rno-miR-30a-5p,rno-miR-30d-5p,rno-miR-30b-5p,rno-miR-30c-5p,rno-miR-384-5p
C2dat2	noncoding	NM_001013967	Mmgt2	protein_coding	5.11e-08	3.62e-05	29	6	25	0.24	9	0.666667	765	rno-miR-30e-5p,rno-miR-30a-5p,rno-miR-30d-5p,rno-miR-30b-5p,rno-miR-30c-5p,rno-miR-384-5p
C2dat2	noncoding	NM_001134464	Llph	protein_coding	0.000209978	0.00979166	456	5	25	0.2	19	0.263158	765	rno-miR-342-5p,rno-miR-29b-3p,rno-miR-29c-3p,rno-miR-29a-3p,rno-miR-770-5p
C2dat2	noncoding	NM_001005898	Omg	protein_coding	0.000209978	0.00979166	457	5	25	0.2	19	0.263158	765	rno-miR-30e-5p,rno-miR-30a-5p,rno-miR-30d-5p,rno-miR-30b-5p,rno-miR-30c-5p
C2dat2	noncoding	NM_001011927	Atp6v0d1	protein_coding	0.000121408	0.00687463	376	6	25	0.24	27	0.222222	765	rno-miR-30e-5p,rno-miR-30a-5p,rno-miR-30d-5p,rno-miR-30c-5p,rno-miR-140-3p,rno-miR-384-5p
C2dat2	noncoding	NM_001108503	Polr3e	protein_coding	1.85e-05	0.00198481	198	6	25	0.24	20	0.3	765	rno-miR-30e-5p,rno-miR-30a-5p,rno-miR-30d-5p,rno-miR-30b-5p,rno-miR-30c-5p,rno-miR-384-5p
C2dat2	noncoding	NM_001135767	Gngt2	protein_coding	4.44e-09	7.93e-06	12	6	25	0.24	7	0.857143	765	rno-miR-30e-5p,rno-miR-30a-5p,rno-miR-30d-5p,rno-miR-30b-5p,rno-miR-30c-5p,rno-miR-384-5p
C2dat2	noncoding	NM_001037657	Rbm12	protein_coding	9.28e-06	0.00121794	162	6	25	0.24	18	0.333333	765	rno-miR-30e-5p,rno-miR-30a-5p,rno-miR-30d-5p,rno-miR-30b-5p,rno-miR-30c-5p,rno-miR-384-5p
C2dat2	noncoding	NM_052798	Zfp354a	protein_coding	0.000209978	0.00979166	458	5	25	0.2	19	0.263158	765	rno-miR-29b-3p,rno-miR-29c-3p,rno-miR-29a-3p,rno-miR-483-3p,rno-miR-3557-3p
C2dat2	noncoding	ENSRNOT00000002736	Ythdc1	protein_coding	5.34e-06	0.000804264	141	7	25	0.28	25	0.28	765	rno-miR-30e-5p,rno-miR-30a-5p,rno-miR-30d-5p,rno-miR-30b-5p,rno-miR-30c-5p,rno-miR-145-5p,rno-miR-384-5p
C2dat2	noncoding	NM_001003958	Dnmt3a	protein_coding	4.93e-05	0.00394889	267	7	25	0.28	34	0.205882	765	rno-miR-29b-3p,rno-miR-29c-3p,rno-miR-29a-3p,rno-miR-101a-3p,rno-miR-101b-3p,rno-miR-10b-3p,rno-miR-384-5p
C2dat2	noncoding	NM_031979	Ybx3	protein_coding	6.03e-08	3.91e-05	33	8	25	0.32	21	0.380952	765	rno-miR-30e-5p,rno-miR-204-5p,rno-miR-30b-5p,rno-miR-30c-5p,rno-miR-29b-3p,rno-miR-29c-3p,rno-miR-29a-3p,rno-miR-211-5p
C2dat2	noncoding	NM_001039002	Fam43a	protein_coding	7.59e-05	0.00527463	307	6	25	0.24	25	0.24	765	rno-miR-30e-5p,rno-miR-30a-5p,rno-miR-30d-5p,rno-miR-30b-5p,rno-miR-30c-5p,rno-miR-384-5p
C2dat2	noncoding	NM_001100988	Spidr	protein_coding	5.9e-05	0.00436066	280	6	25	0.24	24	0.25	765	rno-miR-30e-5p,rno-miR-30a-5p,rno-miR-30d-5p,rno-miR-30b-5p,rno-miR-30c-5p,rno-miR-384-5p
C2dat2	noncoding	NM_001107400	Celf4	protein_coding	0.000227972	0.0103379	470	6	25	0.24	30	0.2	765	rno-miR-30e-5p,rno-miR-30a-5p,rno-miR-30d-5p,rno-miR-30b-5p,rno-miR-30c-5p,rno-miR-384-5p
C2dat2	noncoding	NM_001034163	Blmh	protein_coding	0.000121408	0.00687463	377	6	25	0.24	27	0.222222	765	rno-miR-449a-3p,rno-miR-342-5p,rno-miR-29b-3p,rno-miR-29c-3p,rno-miR-29a-3p,rno-miR-140-3p
C2dat2	noncoding	NM_080906	ddit4	protein_coding	1.02e-06	0.000254367	85	9	25	0.36	39	0.230769	765	rno-miR-30e-5p,rno-miR-30a-5p,rno-miR-30d-5p,rno-miR-6315,rno-miR-101a-3p,rno-miR-101b-3p,rno-miR-140-3p,rno-miR-483-3p,rno-miR-384-5p
C2dat2	noncoding	NM_001013187	Slc25a30	protein_coding	3.79e-06	0.000660108	123	9	25	0.36	45	0.2	765	rno-miR-30e-5p,rno-miR-30a-5p,rno-miR-30d-5p,rno-miR-30b-5p,rno-miR-30c-5p,rno-miR-29b-3p,rno-miR-29c-3p,rno-miR-29a-3p,rno-miR-384-5p
C2dat2	noncoding	NM_001083966	Rev3l	protein_coding	2.28e-08	2.27e-05	20	12	25	0.48	57	0.210526	765	rno-miR-30e-5p,rno-miR-30a-5p,rno-miR-30d-5p,rno-miR-30b-5p,rno-miR-30c-5p,rno-miR-29b-3p,rno-miR-29c-3p,rno-miR-29a-3p,rno-miR-101a-3p,rno-miR-101b-3p,rno-miR-145-5p,rno-miR-384-5p
C2dat2	noncoding	NM_001108213	Rev1	protein_coding	5.34e-06	0.000804264	142	7	25	0.28	25	0.28	765	rno-miR-30e-5p,rno-miR-30a-5p,rno-miR-30d-5p,rno-miR-6315,rno-miR-30b-5p,rno-miR-30c-5p,rno-miR-384-5p
C2dat2	noncoding	NM_012969	Irs1	protein_coding	0.000227972	0.0103379	471	6	25	0.24	30	0.2	765	rno-miR-30e-5p,rno-miR-30a-5p,rno-miR-30d-5p,rno-miR-30b-5p,rno-miR-30c-5p,rno-miR-384-5p
C2dat2	noncoding	NM_139084	Magi3	protein_coding	2.03e-06	0.000399331	108	9	25	0.36	42	0.214286	765	rno-miR-30e-5p,rno-miR-30a-5p,rno-miR-30d-5p,rno-miR-449a-3p,rno-miR-30b-5p,rno-miR-30c-5p,rno-miR-101a-3p,rno-miR-101b-3p,rno-miR-384-5p
C2dat2	noncoding	NM_019187	Coq3	protein_coding	6.49e-10	2.35e-06	4	6	25	0.24	6	1	765	rno-miR-30e-5p,rno-miR-30a-5p,rno-miR-30d-5p,rno-miR-30b-5p,rno-miR-30c-5p,rno-miR-384-5p
C2dat2	noncoding	NM_001008315	Ltbr	protein_coding	0.000839066	0.0257667	695	5	25	0.2	25	0.2	765	rno-miR-342-5p,rno-miR-29b-3p,rno-miR-29c-3p,rno-miR-29a-3p,rno-miR-770-5p
C2dat2	noncoding	NM_001013172	Fhl4	protein_coding	0.00055571	0.0198425	593	5	25	0.2	23	0.217391	765	rno-miR-29b-3p,rno-miR-29c-3p,rno-miR-29a-3p,rno-miR-140-3p,rno-miR-770-5p
C2dat2	noncoding	NM_022185	Pik3r2	protein_coding	6.32e-06	0.000889888	150	6	25	0.24	17	0.352941	765	rno-miR-30e-5p,rno-miR-30a-5p,rno-miR-30d-5p,rno-miR-30b-5p,rno-miR-30c-5p,rno-miR-384-5p
C2dat2	noncoding	NM_001106520	RGD1566320	protein_coding	3.42e-05	0.0030083	240	6	25	0.24	22	0.272727	765	rno-miR-30e-5p,rno-miR-30a-5p,rno-miR-30d-5p,rno-miR-30b-5p,rno-miR-30c-5p,rno-miR-384-5p
C2dat2	noncoding	NM_053990	Ptpn2	protein_coding	9.97e-06	0.00127783	166	5	25	0.2	11	0.454545	765	rno-miR-30e-5p,rno-miR-30a-5p,rno-miR-30d-5p,rno-miR-30b-5p,rno-miR-384-5p
C2dat2	noncoding	NM_019218	Neurod1	protein_coding	3.42e-05	0.0030083	242	6	25	0.24	22	0.272727	765	rno-miR-30e-5p,rno-miR-30a-5p,rno-miR-30d-5p,rno-miR-30b-5p,rno-miR-30c-5p,rno-miR-384-5p
C2dat2	noncoding	NM_001079887	Ing4	protein_coding	7.15e-06	0.000980676	156	7	25	0.28	26	0.269231	765	rno-miR-204-5p,rno-miR-30b-5p,rno-miR-30c-5p,rno-miR-140-3p,rno-miR-211-5p,rno-miR-3557-3p,rno-miR-384-5p
C2dat2	noncoding	NM_001106407	Cenpk	protein_coding	5.9e-05	0.00436066	282	6	25	0.24	24	0.25	765	rno-miR-30e-5p,rno-miR-30a-5p,rno-miR-30d-5p,rno-miR-30b-5p,rno-miR-30c-5p,rno-miR-384-5p
C2dat2	noncoding	NM_001277057	Ascc3	protein_coding	0.000151157	0.00798853	402	6	25	0.24	28	0.214286	765	rno-miR-30e-5p,rno-miR-30b-5p,rno-miR-30c-5p,rno-miR-101a-3p,rno-miR-101b-3p,rno-miR-384-5p
C2dat2	noncoding	NM_001106635	Arid1a	protein_coding	3.1e-06	0.000552182	120	9	25	0.36	44	0.204545	765	rno-miR-30e-5p,rno-miR-30a-5p,rno-miR-30d-5p,rno-miR-6315,rno-miR-30b-5p,rno-miR-30c-5p,rno-miR-101a-3p,rno-miR-101b-3p,rno-miR-384-5p
C2dat2	noncoding	ENSRNOT00000002888	Lrrc8d	protein_coding	2.33e-08	2.27e-05	22	8	25	0.32	19	0.421053	765	rno-miR-30e-5p,rno-miR-30a-5p,rno-miR-30d-5p,rno-miR-204-5p,rno-miR-30b-5p,rno-miR-30c-5p,rno-miR-211-5p,rno-miR-384-5p
C2dat2	noncoding	NM_001164505	Rnf165	protein_coding	1.23e-05	0.00152525	172	7	25	0.28	28	0.25	765	rno-miR-449a-3p,rno-miR-29b-3p,rno-miR-29c-3p,rno-miR-29a-3p,rno-miR-140-3p,rno-miR-483-3p,rno-miR-770-5p
C2dat2	noncoding	ENSRNOT00000027392	RGD1305592	protein_coding	5.11e-08	3.62e-05	30	6	25	0.24	9	0.666667	765	rno-miR-30e-5p,rno-miR-30a-5p,rno-miR-30d-5p,rno-miR-30b-5p,rno-miR-30c-5p,rno-miR-384-5p
C2dat2	noncoding	NM_001002819	Gfpt2	protein_coding	3.22e-05	0.00300691	229	7	25	0.28	32	0.21875	765	rno-miR-30e-5p,rno-miR-30a-5p,rno-miR-673-3p,rno-miR-30d-5p,rno-miR-30b-5p,rno-miR-30c-5p,rno-miR-384-5p
C2dat2	noncoding	NM_001004215	Ppic	protein_coding	2.54e-05	0.00253938	214	6	25	0.24	21	0.285714	765	rno-miR-204-5p,rno-miR-29b-3p,rno-miR-29c-3p,rno-miR-29a-3p,rno-miR-211-5p,rno-miR-145-5p
C2dat2	noncoding	ENSRNOT00000071978	Pdss1	protein_coding	1.29e-06	0.000300787	90	5	25	0.2	8	0.625	765	rno-miR-30a-5p,rno-miR-30d-5p,rno-miR-30b-5p,rno-miR-30c-5p,rno-miR-384-5p
C2dat2	noncoding	NM_001108344	Ube2t	protein_coding	1.45e-07	6.14e-05	50	5	25	0.2	6	0.833333	765	rno-miR-30e-5p,rno-miR-30a-5p,rno-miR-30d-5p,rno-miR-30c-5p,rno-miR-384-5p
C2dat2	noncoding	NM_001201355	Hmgn3	protein_coding	5.93e-05	0.00436066	289	5	25	0.2	15	0.333333	765	rno-miR-29b-3p,rno-miR-29c-3p,rno-miR-29a-3p,rno-miR-770-5p,rno-miR-3557-3p
C2dat2	noncoding	NM_181378	Ctsm	protein_coding	0.00011684	0.00677711	366	5	25	0.2	17	0.294118	765	rno-miR-30a-5p,rno-miR-30d-5p,rno-miR-30b-5p,rno-miR-30c-5p,rno-miR-3557-3p
C2dat2	noncoding	NM_001039336	Zdhhc20	protein_coding	6.32e-06	0.000889888	151	6	25	0.24	17	0.352941	765	rno-miR-30e-5p,rno-miR-30a-5p,rno-miR-30d-5p,rno-miR-204-5p,rno-miR-30b-5p,rno-miR-30c-5p
C2dat2	noncoding	NM_001105902	Pex11g	protein_coding	1.67e-05	0.0018254	196	5	25	0.2	12	0.416667	765	rno-miR-673-3p,rno-miR-204-5p,rno-miR-29b-3p,rno-miR-29c-3p,rno-miR-29a-3p
C2dat2	noncoding	ENSRNOT00000054794	Prune2	protein_coding	0.000839066	0.0257667	697	5	25	0.2	25	0.2	765	rno-miR-30a-5p,rno-miR-30b-5p,rno-miR-30c-5p,rno-miR-3557-3p,rno-miR-384-5p
C2dat2	noncoding	NM_001271193	Ago3	protein_coding	1.33e-05	0.00155123	181	6	25	0.24	19	0.315789	765	rno-miR-30e-5p,rno-miR-30a-5p,rno-miR-30d-5p,rno-miR-30b-5p,rno-miR-30c-5p,rno-miR-384-5p
C2dat2	noncoding	NM_181362	Cand2	protein_coding	0.000158211	0.00808197	418	5	25	0.2	18	0.277778	765	rno-miR-30e-5p,rno-miR-30a-5p,rno-miR-342-5p,rno-miR-30b-5p,rno-miR-30c-5p
C2dat2	noncoding	NM_001015014	Surf6	protein_coding	3.88e-08	3.32e-05	25	10	25	0.4	37	0.27027	765	rno-miR-342-5p,rno-miR-29b-3p,rno-miR-29c-3p,rno-miR-29a-3p,rno-miR-101a-3p,rno-miR-140-3p,rno-miR-145-5p,rno-miR-10b-3p,rno-miR-770-5p,rno-miR-3557-3p
C2dat2	noncoding	NM_001169127	Tspan14	protein_coding	0.00055571	0.0198425	595	5	25	0.2	23	0.217391	765	rno-miR-6315,rno-miR-29b-3p,rno-miR-29c-3p,rno-miR-29a-3p,rno-miR-770-5p
C2dat2	noncoding	NM_001305184	Afap1l2	protein_coding	1.29e-06	0.000300787	92	9	25	0.36	40	0.225	765	rno-miR-30e-5p,rno-miR-30a-5p,rno-miR-30d-5p,rno-miR-204-5p,rno-miR-30b-5p,rno-miR-30c-5p,rno-miR-211-5p,rno-miR-3557-3p,rno-miR-384-5p
C2dat2	noncoding	NM_001107334	Mfsd14b	protein_coding	4e-05	0.00344921	248	7	25	0.28	33	0.212121	765	rno-miR-6315,rno-miR-29b-3p,rno-miR-29c-3p,rno-miR-29a-3p,rno-miR-101a-3p,rno-miR-101b-3p,rno-miR-140-3p
C2dat2	noncoding	NM_022386	Mafg	protein_coding	0.000686433	0.0228143	642	5	25	0.2	24	0.208333	765	rno-miR-30e-5p,rno-miR-30a-5p,rno-miR-30d-5p,rno-miR-30b-5p,rno-miR-30c-5p
C2dat2	noncoding	NM_001191626	Mex3b	protein_coding	2.74e-09	6.51e-06	9	11	25	0.44	38	0.289474	765	rno-miR-30e-5p,rno-miR-30a-5p,rno-miR-30d-5p,rno-miR-30b-5p,rno-miR-30c-5p,rno-miR-29b-3p,rno-miR-29c-3p,rno-miR-29a-3p,rno-miR-101a-3p,rno-miR-101b-3p,rno-miR-384-5p
C2dat2	noncoding	NM_001107254	Samd4a	protein_coding	0.000686433	0.0228143	643	5	25	0.2	24	0.208333	765	rno-miR-30a-5p,rno-miR-30d-5p,rno-miR-30b-5p,rno-miR-30c-5p,rno-miR-384-5p
C2dat2	noncoding	NM_001191962	Gpsm2	protein_coding	8.43e-05	0.00560585	322	5	25	0.2	16	0.3125	765	rno-miR-30a-5p,rno-miR-30d-5p,rno-miR-30b-5p,rno-miR-30c-5p,rno-miR-384-5p
C2dat2	noncoding	NM_001108083	Usp44	protein_coding	3.92e-06	0.000666649	126	7	25	0.28	24	0.291667	765	rno-miR-30e-5p,rno-miR-30a-5p,rno-miR-30d-5p,rno-miR-342-5p,rno-miR-30b-5p,rno-miR-30c-5p,rno-miR-384-5p
C2dat2	noncoding	NM_001013991	Tmem175	protein_coding	2.69e-07	8.99e-05	64	6	25	0.24	11	0.545455	765	rno-miR-30e-5p,rno-miR-30a-5p,rno-miR-30d-5p,rno-miR-30b-5p,rno-miR-30c-5p,rno-miR-384-5p
C2dat2	noncoding	NM_053492	Slc44a1	protein_coding	0.000227972	0.0103379	472	6	25	0.24	30	0.2	765	rno-miR-30e-5p,rno-miR-30a-5p,rno-miR-30d-5p,rno-miR-30b-5p,rno-miR-30c-5p,rno-miR-384-5p
C2dat2	noncoding	NM_053932	B3gnt5	protein_coding	8.61e-09	1.23e-05	15	13	25	0.52	65	0.2	765	rno-miR-30e-5p,rno-miR-30a-5p,rno-miR-30d-5p,rno-miR-449a-3p,rno-miR-204-5p,rno-miR-30b-5p,rno-miR-30c-5p,rno-miR-29b-3p,rno-miR-29c-3p,rno-miR-29a-3p,rno-miR-211-5p,rno-miR-10b-3p,rno-miR-384-5p
C2dat2	noncoding	NM_001107918	Usp45	protein_coding	0.000151157	0.00798853	405	6	25	0.24	28	0.214286	765	rno-miR-30e-5p,rno-miR-30a-5p,rno-miR-30d-5p,rno-miR-30b-5p,rno-miR-30c-5p,rno-miR-384-5p
C2dat2	noncoding	NM_001201353	Hmgn3	protein_coding	5.93e-05	0.00436066	290	5	25	0.2	15	0.333333	765	rno-miR-29b-3p,rno-miR-29c-3p,rno-miR-29a-3p,rno-miR-770-5p,rno-miR-3557-3p
C2dat2	noncoding	NM_001012219	Lhx8	protein_coding	0.000121408	0.00687463	378	6	25	0.24	27	0.222222	765	rno-miR-30e-5p,rno-miR-30a-5p,rno-miR-30d-5p,rno-miR-30b-5p,rno-miR-30c-5p,rno-miR-384-5p
C2dat2	noncoding	NM_053414	Ddx1	protein_coding	1.71e-13	3.65e-09	1	10	25	0.4	14	0.714286	765	rno-miR-30e-5p,rno-miR-30a-5p,rno-miR-30d-5p,rno-miR-30b-5p,rno-miR-30c-5p,rno-miR-29b-3p,rno-miR-29c-3p,rno-miR-29a-3p,rno-miR-770-5p,rno-miR-384-5p
C2dat2	noncoding	NM_138888	Phf5a	protein_coding	1.33e-05	0.00155123	183	6	25	0.24	19	0.315789	765	rno-miR-204-5p,rno-miR-29b-3p,rno-miR-29c-3p,rno-miR-29a-3p,rno-miR-211-5p,rno-miR-770-5p
C2dat2	noncoding	NM_001107279	Pcdh17	protein_coding	1.41e-06	0.000306931	98	7	25	0.28	21	0.333333	765	rno-miR-30e-5p,rno-miR-30a-5p,rno-miR-30d-5p,rno-miR-30b-5p,rno-miR-30c-5p,rno-miR-140-3p,rno-miR-384-5p
C2dat2	noncoding	NM_001106384	Zfp280b	protein_coding	1.02e-06	0.000254367	86	9	25	0.36	39	0.230769	765	rno-miR-30e-5p,rno-miR-30a-5p,rno-miR-30d-5p,rno-miR-30b-5p,rno-miR-30c-5p,rno-miR-101a-3p,rno-miR-101b-3p,rno-miR-140-3p,rno-miR-384-5p
C2dat2	noncoding	NM_001037655	Henmt1	protein_coding	6.6e-10	2.35e-06	6	9	25	0.36	19	0.473684	765	rno-miR-30e-5p,rno-miR-30a-5p,rno-miR-30d-5p,rno-miR-30b-5p,rno-miR-30c-5p,rno-miR-29b-3p,rno-miR-29c-3p,rno-miR-29a-3p,rno-miR-384-5p
C2dat2	noncoding	NM_001007632	Ascc1	protein_coding	5.93e-05	0.00436066	291	5	25	0.2	15	0.333333	765	rno-miR-29b-3p,rno-miR-29c-3p,rno-miR-29a-3p,rno-miR-140-3p,rno-miR-770-5p
C2dat2	noncoding	NM_001100488	Rimbp2	protein_coding	2.51e-06	0.000471649	114	9	25	0.36	43	0.209302	765	rno-miR-30e-5p,rno-miR-30a-5p,rno-miR-30d-5p,rno-miR-30b-5p,rno-miR-30c-5p,rno-miR-101a-3p,rno-miR-101b-3p,rno-miR-3557-3p,rno-miR-384-5p
C2dat2	noncoding	NM_001106347	Plgrkt	protein_coding	9.56e-07	0.00024659	83	6	25	0.24	13	0.461538	765	rno-miR-30e-5p,rno-miR-30a-5p,rno-miR-30d-5p,rno-miR-30b-5p,rno-miR-30c-5p,rno-miR-384-5p
C2dat2	noncoding	NM_001015032	Galnt3	protein_coding	1.9e-06	0.000388188	105	8	25	0.32	31	0.258065	765	rno-miR-30e-5p,rno-miR-30a-5p,rno-miR-30d-5p,rno-miR-6315,rno-miR-30b-5p,rno-miR-30c-5p,rno-miR-770-5p,rno-miR-384-5p
#
